# Supplementary material
Source: PubMed Central journal article supplement (PMC3446794)
Supplement: ismej201240x1.pdf [file ismej201240x1.pdf]

**Supplementary Table S1.**

Coverage and richness estimators (Chao and ACE) for each individual water column clone library calculated in Mothur with an OTU cutoff of 0.03, 0.04, or 0.05

| Sample                 | OTU cutoff | Number of clones | Coverage (%) | Chao | ACE |
|------------------------|------------|------------------|--------------|------|-----|
| AnirKa-M1-10m          | 0.04       | 13               | 85           | 4    | 0   |
| AnirKa-M1-40m          | 0.05       | 19               | 79           | 9    | 16  |
| AnirKa-M1-100m         | 0.05       | 29               | 83           | 16   | 1   |
| AnirKa-M1-200m         | 0.05       | 17               | 94           | 5    | 7   |
| AnirKa-M2-10m          | 0.05       | 23               | 91           | 5    | 7   |
| AnirKa-M2-40m          | 0.05       | 14               | 100          | 2    | 2   |
| AnirKa-M2-100m         | 0.05       | 15               | 87           | 5    | 7   |
| AnirKa-M2-200m         | 0.05       | 15               | 93           | 6    | 6   |
| AnirKb-M1-10m          | 0.05       | 17               | 65           | 14   | 17  |
| AnirKb-M1-40m          | 0.05       | 18               | 67           | 14   | 17  |
| AnirKb-M1-100m         | 0.04       | 17               | 71           | 18   | 22  |
| AnirKb-M1-200m         | 0.05       | 17               | 65           | 24   | 20  |
| AnirKb-M2-10m          | 0.05       | 20               | 75           | 14   | 15  |
| AnirKb-M2-40m          | 0.05       | 16               | 88           | 6    | 8   |
| AnirKb-M2-100m         | 0.05       | 15               | 87           | 7    | 7   |
| AnirKb-M2-200m         | 0.05       | 15               | 100          | 5    | 5   |
| amoA-M1-10m            | 0.05       | 15               | 80           | 7    | 1   |
| amoA-M1-40m            | 0.04       | 8                | 50           | 11   | 35  |
| amoA-M1-200m           | 0.04       | 13               | 75           | 8    | 9   |
| amoA-M2-40m            | 0.05       | 14               | 79           | 7    | 1   |
| amoA-M2-100m           | 0.05       | 16               | 88           | 6    | 7   |
| amoA-M2-200m           | 0.05       | 14               | 83           | 6    | 7   |
| cDNA-AnirKa-M1-10m     | 0.04       | 26               | 96           | 3    | 4   |
| cDNA-AnirKa-M1-40m     | 0.05       | 19               | 95           | 5    | 6   |
| cDNA-AnirKa-M1-200m    | 0.04       | 13               | 71           | 10   | 13  |
| cDNA-AnirKb-M1-10m     | 0.05       | 14               | 57           | 17   | 18  |
| cDNA-AnirKb-M1-40m     | 0.04       | 16               | 56           | 16   | 20  |
| cDNA-AnirKb-M1-200m    | 0.05       | 19               | 84           | 10   | 11  |
| cDNA-amoA-M1-10m       | 0.05       | 17               | 100          | 3    | 3   |
| cDNA-amoA-M1-40m       | 0.05       | 23               | 90           | 6    | 9   |
| cDNA-amoA-M1-200m      | 0.05       | 21               | 96           | 4    | 6   |
| AnirKa-Cal.Curr.-30m   | 0.05       | 16               | 89           | 5    | 8   |
| AnirKa-Cal.Curr.-3000m | 0.03       | 16               | 94           | 4    | 5   |
| AnirKb-Cal.Curr.-30m   | 0.03       | 13               | 92           | 3    | 4   |
| AnirKb-Cal.Curr.-3000m | 0.03       | 15               | 93           | 5    | 6   |
| amoA-Cal.Curr.-30m     | 0.03       | 7                | 100          | 1    | 1   |
| amoA-Cal.Curr.-3000m   | 0.05       | 13               | 67           | 10   | 11  |

**Supplementary Table S2.** Monterey Bay CTD and water chemistry data for all samples used in quantitative PCR, '+' indicates if additional molecular analyses were performed in the sample

| Station | Date<br>(yy/mm/dd) | Lat    | Long     | Depth<br>(m) | Temp.<br>(°C) | Salinity<br>‰ | Sigma-T | Chl<br>(mg/m <sup>3</sup> ) | NO <sub>2</sub><br>(μM) | NO <sub>3</sub><br>(μM) | clone<br>library | mRNA<br>qPCR |
|---------|--------------------|--------|----------|--------------|---------------|---------------|---------|-----------------------------|-------------------------|-------------------------|------------------|--------------|
| C1      | 10/5/18            | 36.797 | -121.847 | 30           | 9.1           | 33.96         | 26.28   | 0.74                        | 0.19                    | 28.35                   |                  | +            |
| C1      | 10/5/18            | 36.797 | -121.847 | 100          | 8.8           | 34.01         | 26.37   | 0.56                        | 0.21                    | 29.48                   |                  | +            |
| C1      | 10/5/18            | 36.797 | -121.847 | 200          | 8.6           | 34.04         | 26.44   | 0.81                        | 0.32                    | 30.37                   |                  | +            |
| M1      | 10/5/18            | 36.747 | -122.041 | 10           | 10.7          | 33.72         | 25.82   | 0.77                        | 0.31                    | 21.23                   | +                | +            |
| M1      | 10/5/18            | 36.747 | -122.041 | 30           | 10.1          | 33.75         | 25.95   | 1.18                        | 0.36                    | 23.37                   |                  |              |
| M1      | 10/5/18            | 36.747 | -122.041 | 40           | 9.8           | 33.79         | 26.04   | 0.90                        | 0.28                    | 25.05                   | +                | +            |
| M1      | 10/5/18            | 36.747 | -122.041 | 100          | 8.8           | 34.03         | 26.38   | 0.55                        | 0.15                    | 28.65                   | +                | +            |
| M1      | 10/5/18            | 36.747 | -122.041 | 150          | 8.7           | 34.06         | 26.44   | 0.47                        | 0.20                    | 29.66                   |                  |              |
| M1      | 10/5/18            | 36.747 | -122.041 | 200          | 8.3           | 34.11         | 26.54   | 0.43                        | 0.09                    | -                       | +                | +            |
| M2      | 10/5/18            | 36.687 | -122.382 | 10           | 11.1          | 33.43         | 25.53   | 2.99                        | 0.25                    | 11.41                   |                  | +            |
| M2      | 10/5/18            | 36.687 | -122.382 | 40           | 9.6           | 33.84         | 26.12   | 0.82                        | 0.57                    | 25.91                   |                  | +            |
| M2      | 10/5/18            | 36.687 | -122.382 | 100          | 8.8           | 34.00         | 26.36   | 0.52                        | 0.16                    | 30.59                   |                  | +            |
| M2      | 10/5/18            | 36.687 | -122.382 | 150          | 8.4           | 34.09         | 26.51   | 0.43                        | 0.08                    | 31.37                   |                  | +            |
| M2      | 10/5/18            | 36.687 | -122.382 | 200          | 8.1           | 34.14         | 26.59   | 0.42                        | 0.07                    | 32.51                   |                  |              |
| C1      | 10/8/02            | 36.797 | -121.846 | 10           | 14.0          | 33.66         | 25.15   | 2.08                        | 0.26                    | 6.58                    |                  |              |
| C1      | 10/8/02            | 36.797 | -121.846 | 30           | 10.6          | 33.68         | 25.82   | 1.10                        | 0.48                    | 22.58                   |                  |              |
| C1      | 10/8/02            | 36.797 | -121.846 | 40           | 10.0          | 33.76         | 25.98   | 0.63                        | 0.31                    | 25.91                   |                  |              |
| C1      | 10/8/02            | 36.797 | -121.846 | 100          | 9.3           | 33.92         | 26.22   | 0.40                        | 0.12                    | 25.04                   |                  |              |
| C1      | 10/8/02            | 36.797 | -121.846 | 150          | 8.8           | 33.99         | 26.36   | 0.38                        | 0.18                    | 31.54                   |                  |              |
| C1      | 10/8/02            | 36.797 | -121.846 | 200          | 8.1           | 34.07         | 26.52   | 0.36                        | 0.12                    | 30.39                   |                  |              |
| M1      | 10/8/02            | 36.742 | -122.024 | 30           | 10.5          | 33.64         | 25.80   | 0.92                        | 0.15                    | 22.01                   |                  |              |
| M1      | 10/8/02            | 36.742 | -122.024 | 40           | 10.2          | 33.73         | 25.92   | 0.70                        | 0.17                    | 24.67                   |                  |              |
| M1      | 10/8/02            | 36.742 | -122.024 | 100          | 9.5           | 33.89         | 26.16   | 0.45                        | 0.16                    | 24.88                   |                  |              |
| M1      | 10/8/02            | 36.742 | -122.024 | 150          | 9.1           | 34.01         | 26.32   | 0.37                        | 0.05                    | 30.17                   |                  |              |
| M1      | 10/8/02            | 36.742 | -122.024 | 200          | 8.9           | 34.07         | 26.41   | 0.38                        | 0.02                    | 31.18                   |                  |              |
| M2      | 10/8/02            | 36.702 | -122.4   | 10           | 14.5          | 33.50         | 24.93   | 1.36                        | 0.19                    | 3.80                    |                  |              |
| M2      | 10/8/02            | 36.702 | -122.4   | 40           | 10.6          | 33.69         | 25.82   | 0.73                        | 0.38                    | 21.82                   |                  |              |
| M2      | 10/8/02            | 36.702 | -122.4   | 100          | 9.0           | 33.93         | 26.28   | 0.36                        | 0.06                    | 28.87                   |                  |              |
| M2      | 10/8/02            | 36.702 | -122.4   | 150          | 8.5           | 34.03         | 26.44   | 0.37                        | 0.12                    | 29.31                   |                  |              |
| M2      | 10/8/02            | 36.702 | -122.4   | 200          | 8.3           | 34.07         | 26.50   | 0.38                        | 0.03                    | 30.94                   |                  |              |
| C1      | 10/12/02           | 36.797 | -121.847 | 10           | 11.5          | 33.52         | 25.54   | 8.98                        | 0.22                    | 6.62                    |                  |              |
| C1      | 10/12/02           | 36.797 | -121.847 | 40           | 10.5          | 33.72         | 25.88   | 0.45                        | 0.17                    | 23.02                   |                  |              |
| C1      | 10/12/02           | 36.797 | -121.847 | 100          | 9.6           | 33.89         | 26.16   | 0.41                        | 0.29                    | 27.37                   |                  |              |
| C1      | 10/12/02           | 36.797 | -121.847 | 150          | 9.3           | 33.91         | 26.22   | 0.45                        | 0.20                    | 26.45                   |                  |              |
| C1      | 10/12/02           | 36.797 | -121.847 | 200          | 8.9           | 33.97         | 26.34   | 0.42                        | 0.18                    | 29.71                   |                  |              |
| M1      | 10/12/02           | 36.758 | -122.034 | 10           | 11.3          | 33.53         | 25.58   | 7.47                        | 0.29                    | 8.78                    |                  |              |
| M1      | 10/12/02           | 36.758 | -122.034 | 30           | 11.3          | 33.54         | 25.59   | 5.52                        | 0.34                    | 10.76                   |                  |              |
| M1      | 10/12/02           | 36.758 | -122.034 | 40           | 10.7          | 33.66         | 25.78   | 0.57                        | 0.36                    | 23.00                   |                  |              |
| M1      | 10/12/02           | 36.758 | -122.034 | 100          | 9.4           | 33.87         | 26.17   | 0.35                        | 0.10                    | 28.06                   |                  |              |
| M1      | 10/12/02           | 36.758 | -122.034 | 150          | 9.2           | 34.01         | 26.32   | 0.35                        | 0.14                    | 29.64                   |                  |              |
| M1      | 10/12/02           | 36.758 | -122.034 | 200          | 8.7           | 34.06         | 26.43   | 0.34                        | 0.17                    | 31.68                   |                  |              |
| M2      | 10/12/02           | 36.691 | -122.385 | 10           | 11.5          | 33.18         | 25.27   | 2.25                        | 0.21                    | 7.15                    |                  |              |
| M2      | 10/12/02           | 36.691 | -122.385 | 40           | 11.5          | 33.48         | 25.49   | 1.85                        | 0.32                    | 12.21                   |                  |              |
| M2      | 10/12/02           | 36.691 | -122.385 | 100          | 9.8           | 33.82         | 26.07   | 0.38                        | 0.04                    | 25.99                   |                  |              |
| M2      | 10/12/02           | 36.691 | -122.385 | 150          | 8.9           | 33.94         | 26.30   | 0.33                        | 0.00                    | 28.46                   |                  |              |
| M2      | 10/12/02           | 36.691 | -122.385 | 200          | 8.5           | 34.07         | 26.47   | 0.34                        | 0.23                    | 31.11                   |                  |              |

**Supplementary table S3.** Spearman rank-order correlation ( $\rho$ ) of environmental parameters compared with the gene copy abundance of AnirKa, AnirKb, AOAamoA, and MGI 16S rRNA gene sequences

|                     | Environmental parameters |           |           |           |           | Gene copy abundance |           |          |           |
|---------------------|--------------------------|-----------|-----------|-----------|-----------|---------------------|-----------|----------|-----------|
|                     | [2]                      | [3]       | [4]       | [5]       | [6]       | AnirKa              | AnirKb    | amoA     | MGI       |
| NO <sub>2</sub> [1] | -0.54 ***                | -0.55 *** | 0.56 ***  | 0.69 ***  | -0.57 *** | 0.00                | -0.45 *   | -0.41 *  | -0.39     |
| NO <sub>3</sub> [2] |                          | 0.92 ***  | -0.94 *** | -0.81 *** | 0.95 ***  | 0.09                | 0.76 ***  | 0.64 *** | 0.64 ***  |
| Depth [3]           |                          |           | -0.89 *** | -0.83 *** | 0.91 ***  | 0.01                | 0.60 ***  | 0.48 *   | 0.52 *    |
| Temp. [4]           |                          |           |           | 0.77 ***  | -0.97 *** | 0.01                | -0.68 *** | -0.55 ** | -0.64 *** |
| Chl [5]             |                          |           |           |           | -0.79 *** | -0.03               | -0.61 *** | -0.47 *  | -0.48 *   |
| Sal. [6]            |                          |           |           |           |           | -0.04               | 0.68 ***  | 0.53 **  | 0.63 ***  |

Significance level: \* $p < 0.05$ , \*\* $p < 0.01$ , \*\*\* $p < 0.001$

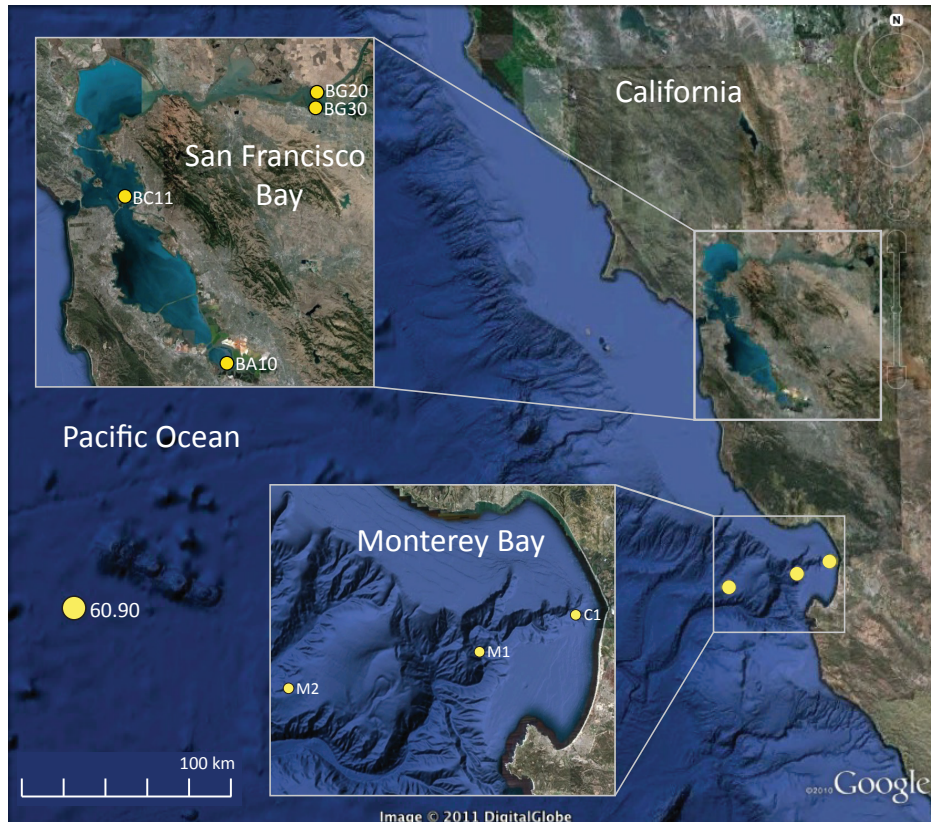

**Supplementary Figure S1.**

Map of sampling stations in Monterey Bay, California Current (60.90), and San Francisco Bay.

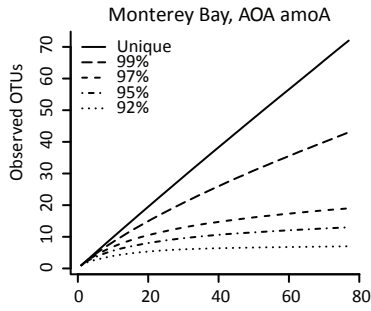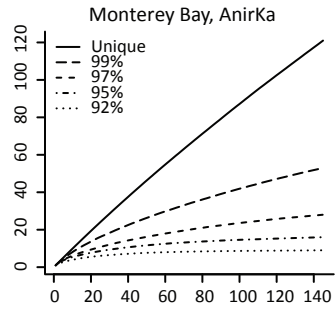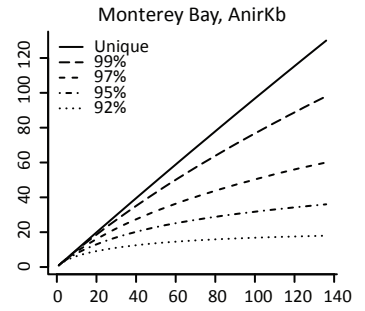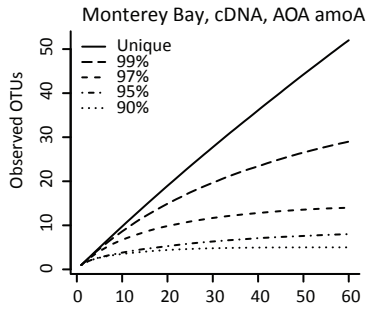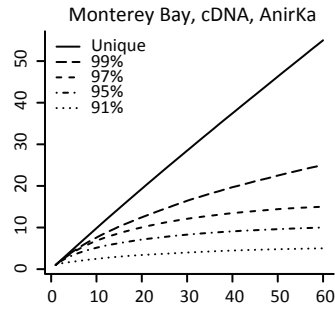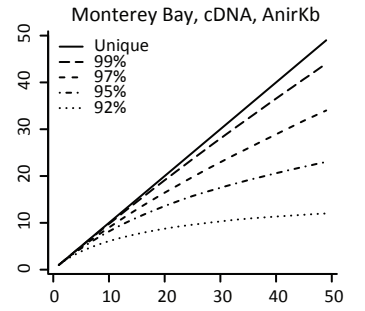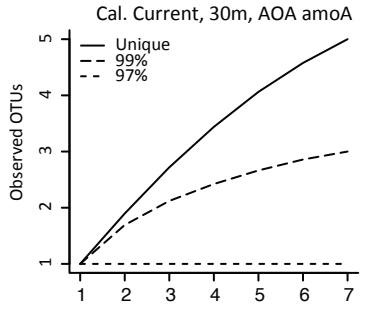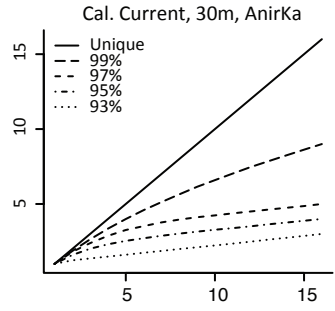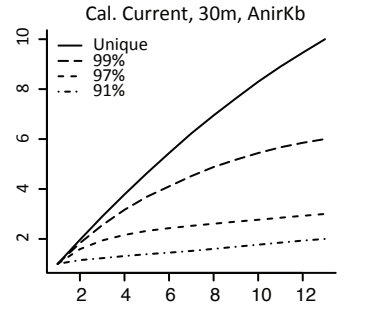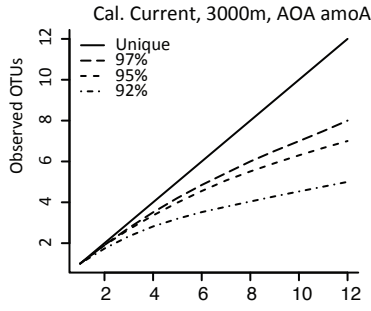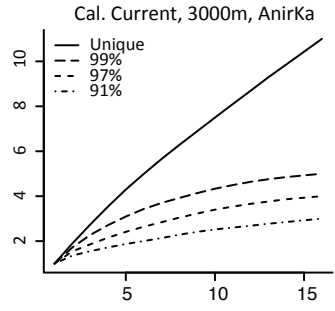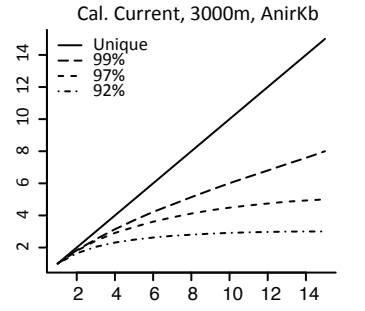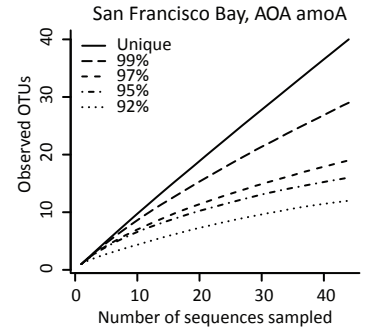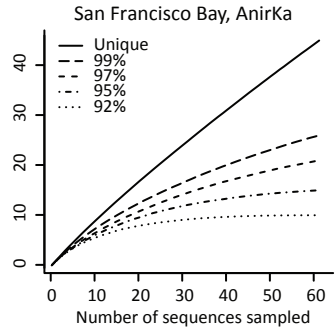

**Supplementary Figure S2.** page 1/3.  
 Rarefaction curves for AnirKa (477 bp), AnirKb (450 bp), and AOA amoA (594 bp) clone libraries from Monterey Bay, California Current station 60.90 from 30 and 3000m, and San Francisco Bay. Calculated in Mothur.

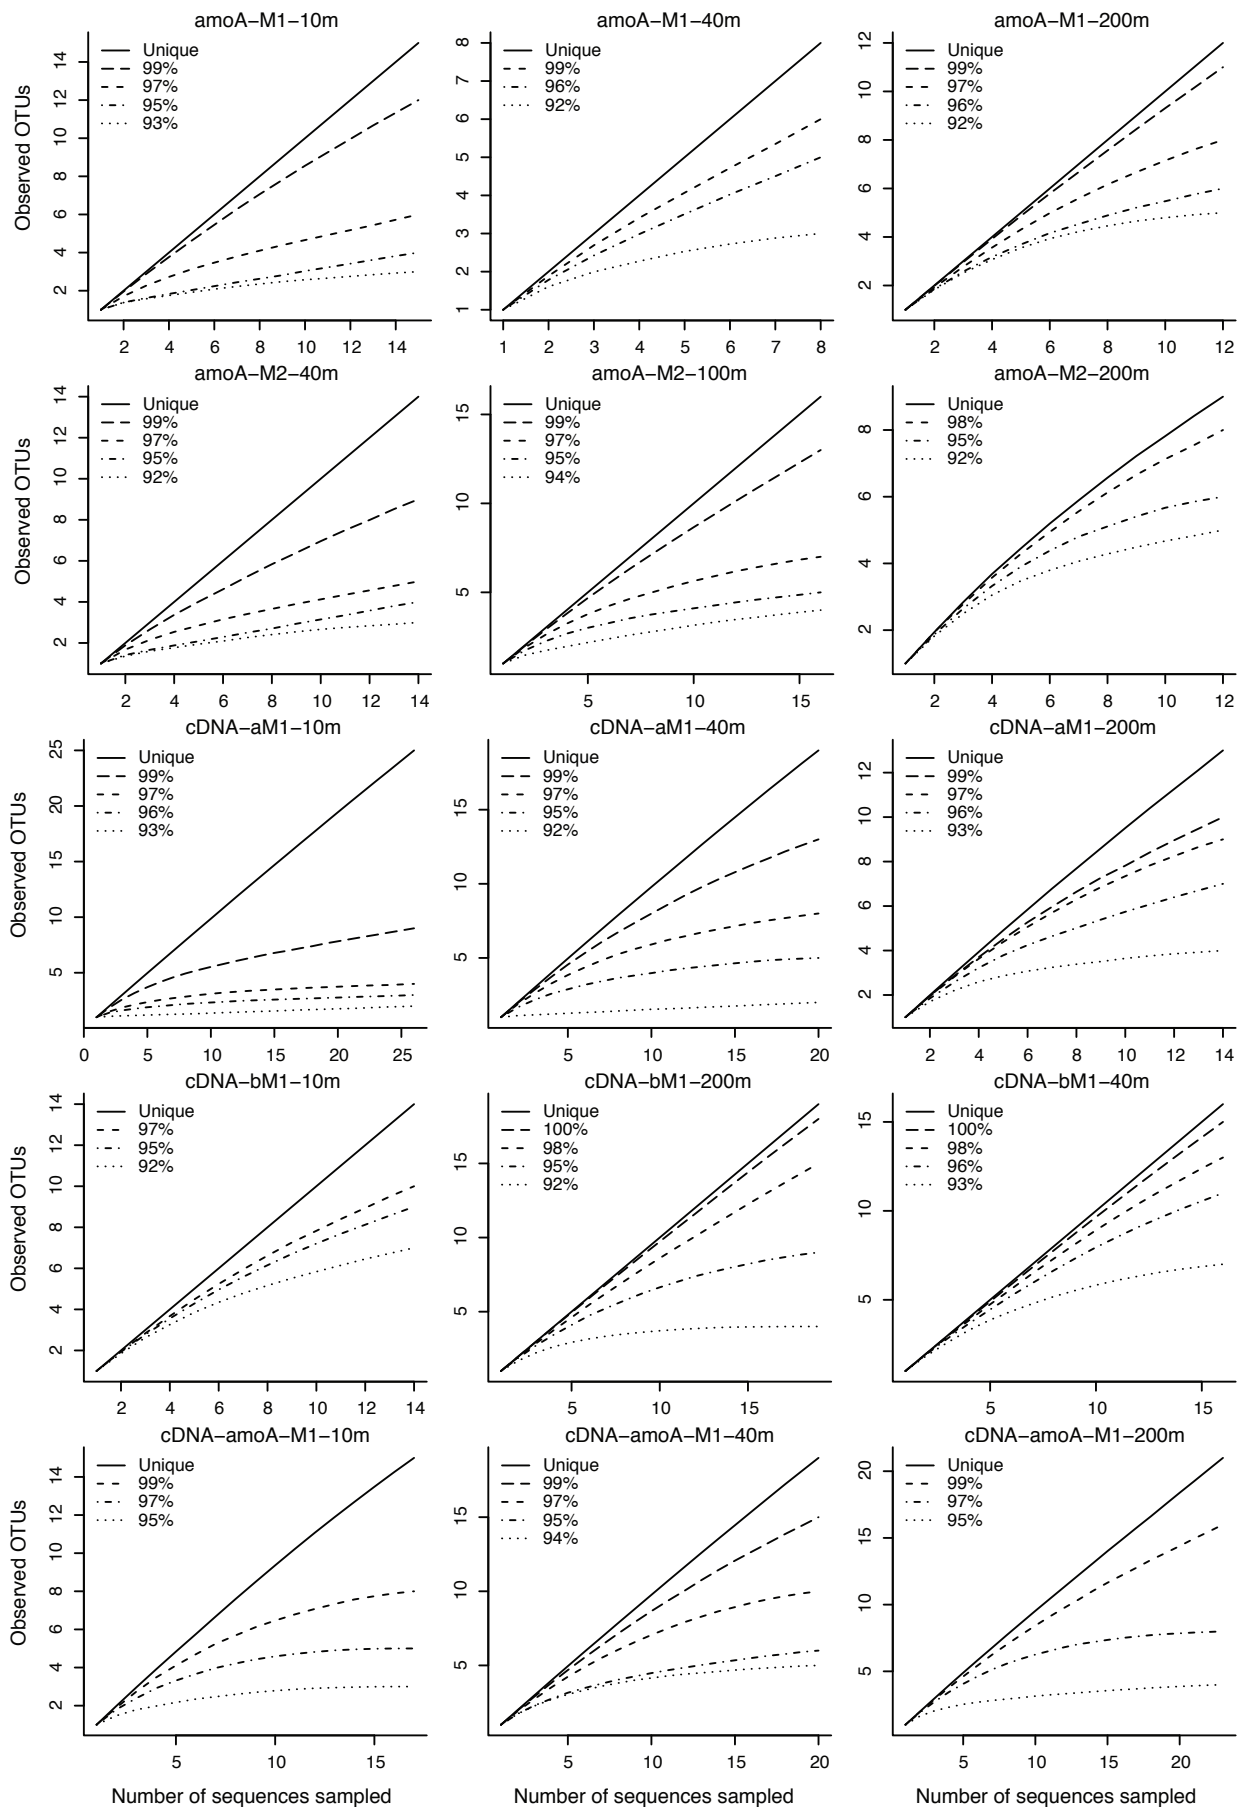

Supplementary Figure S2 continued, page 2/3

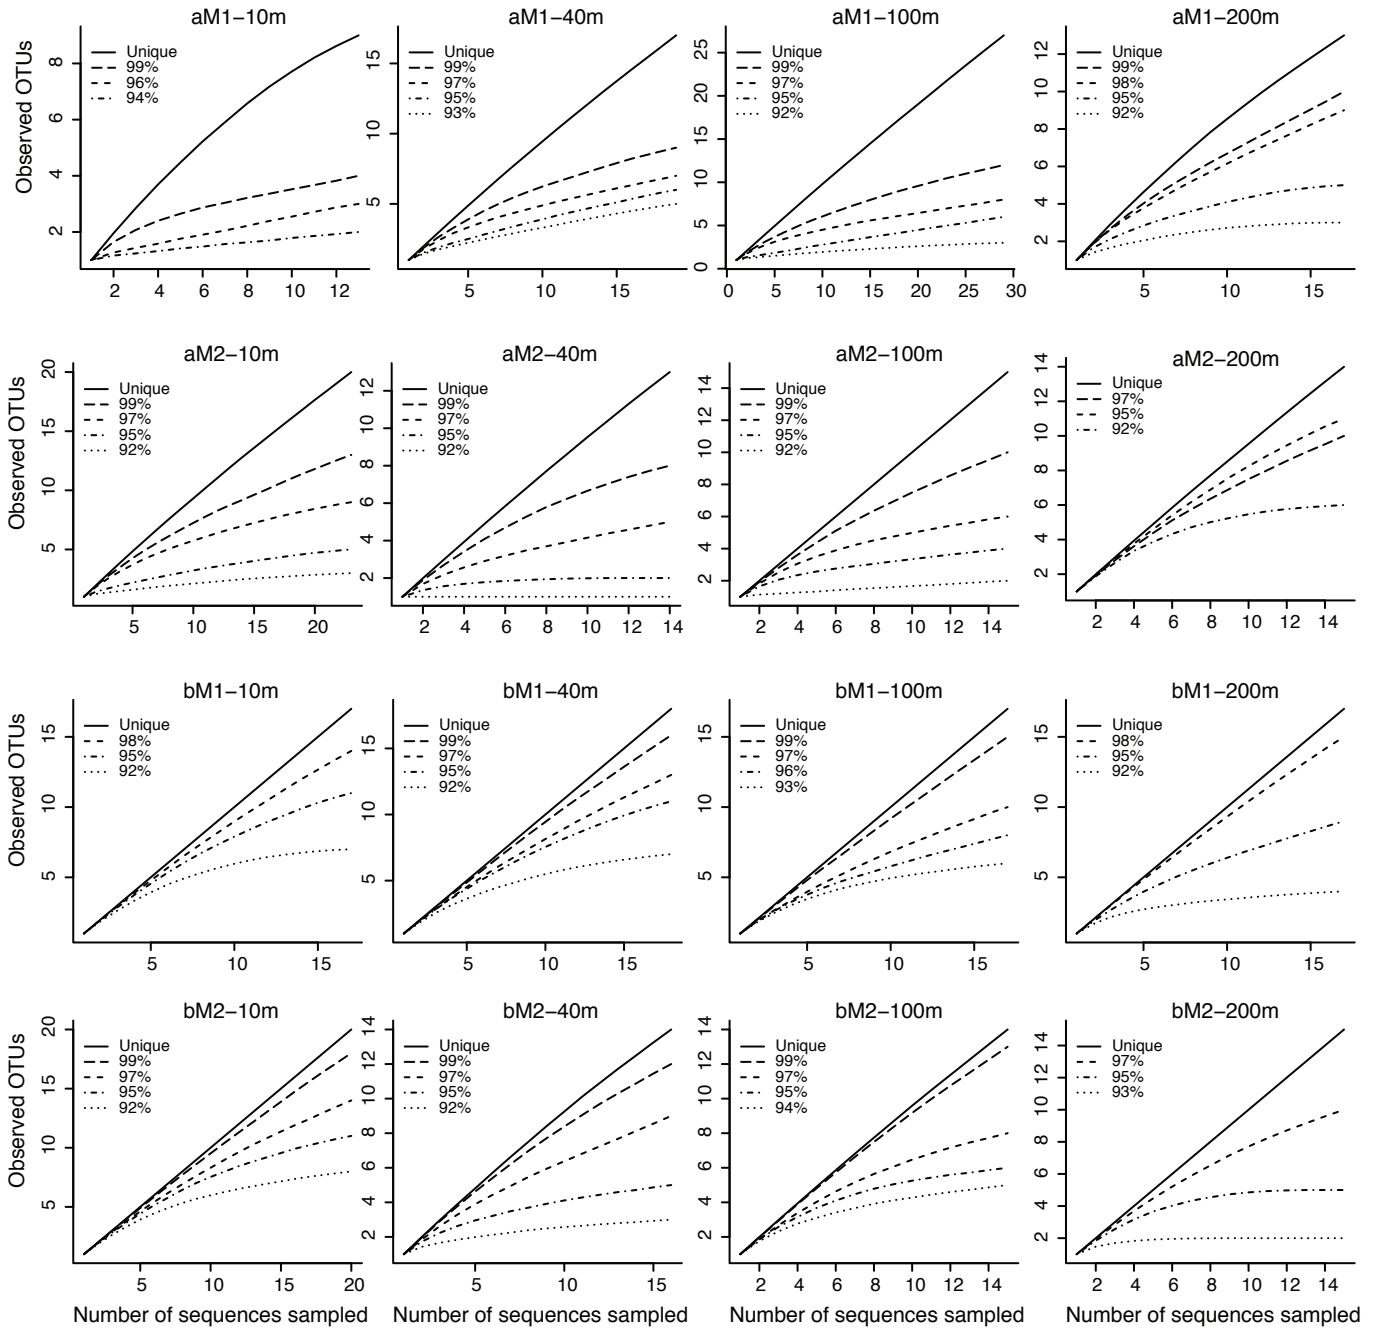

Supplementary Figure S2 continued, page 3/3

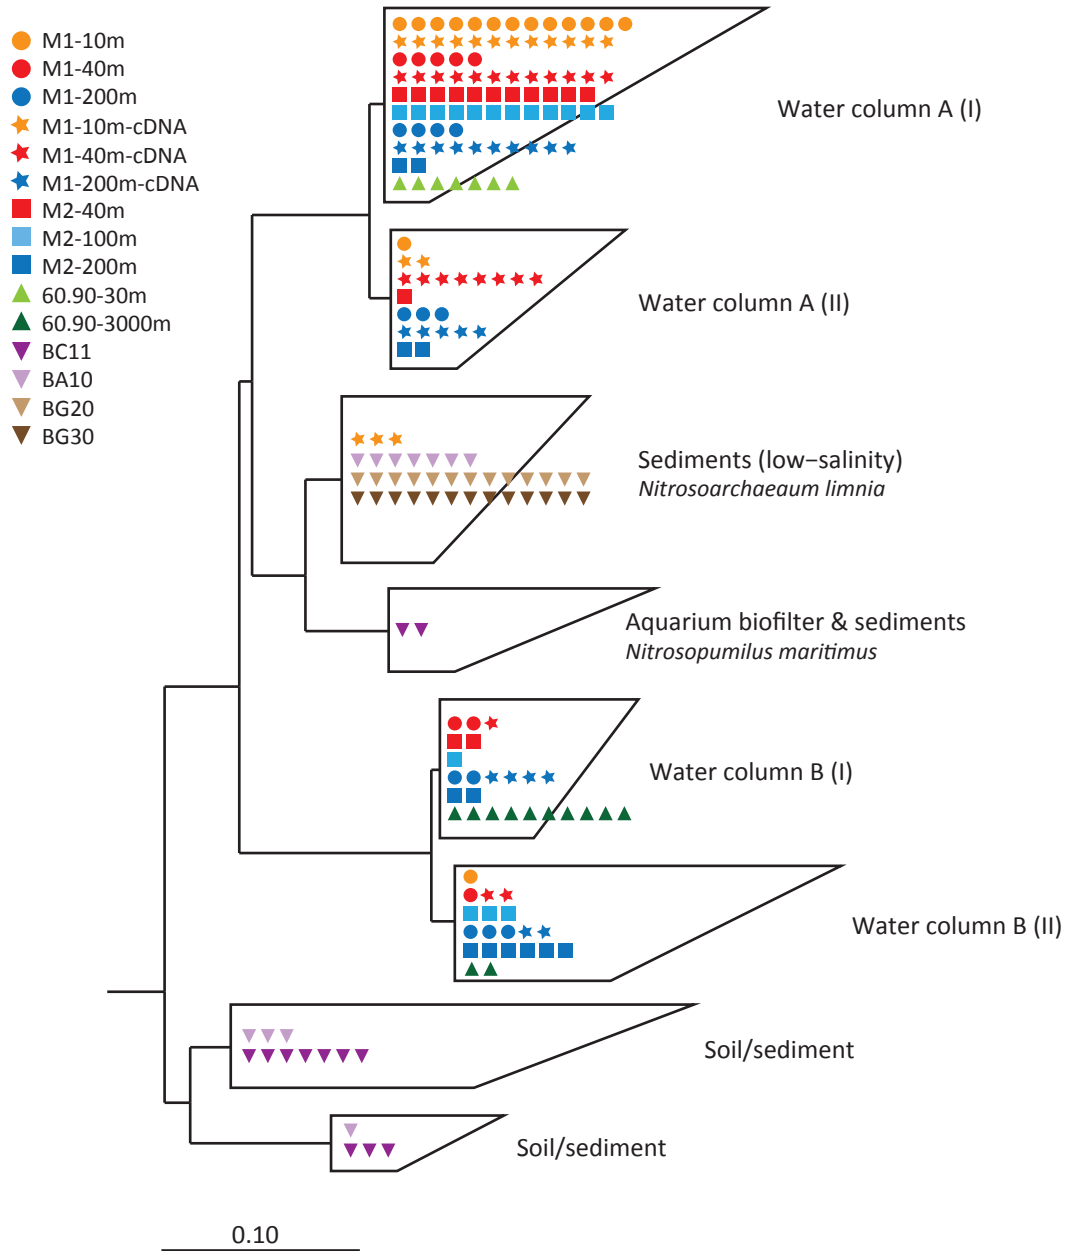

**Supplementary Figure S3.**

Phylogenetic tree of AOA amoA. Clone library sequences were aligned with GenBank sequences in an existing ARB database. Nucleotide tree was constructed by Neighbor Joining with Jukes-Cantor correction in ARB from 594 bp. Colored symbols represent total number of clones belonging to each cluster in the tree (see legend).



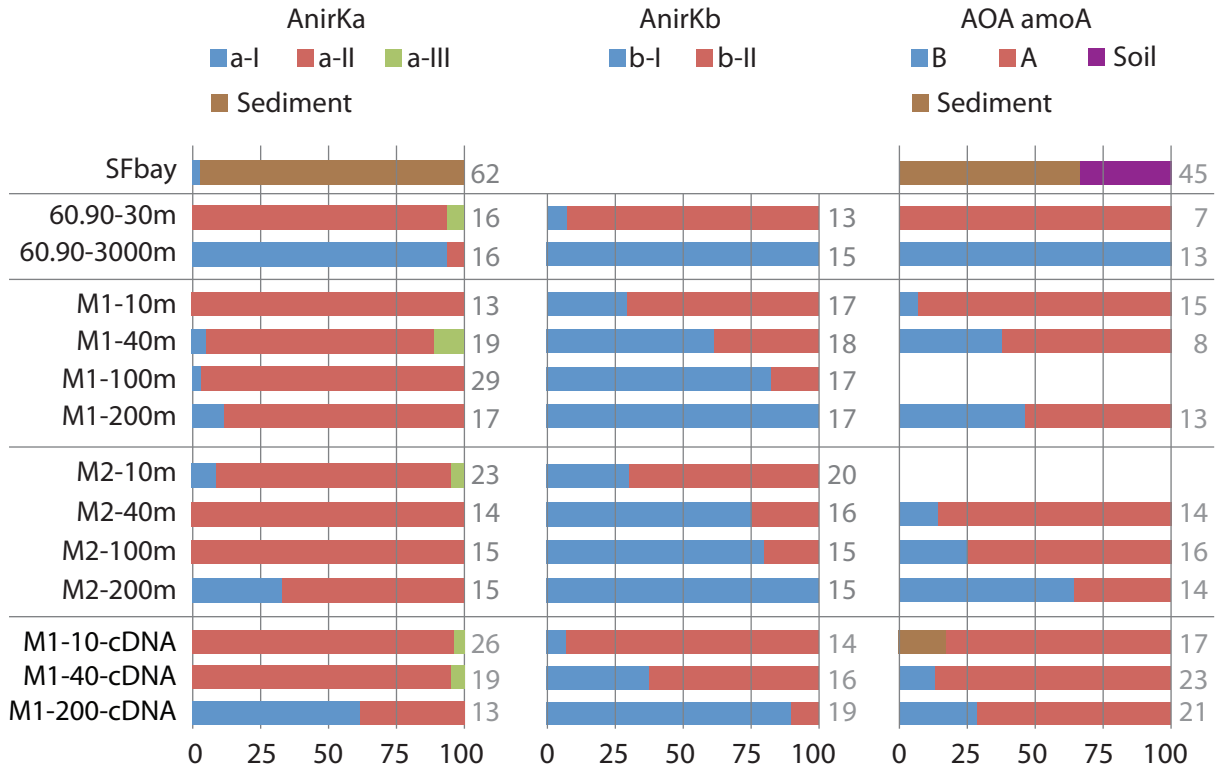

**Supplementary Figure S4.**

Percent of sequences from each clone library belonging to a major phylogenetic cluster. Number of clones in each library is shown in grey.

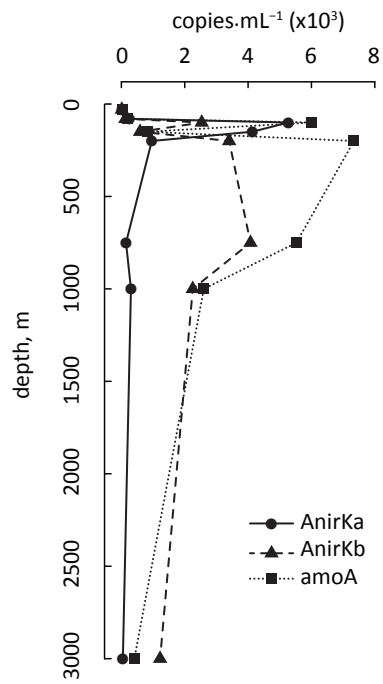

**Supplementary Figure S6.**

Water column profile of AnirKa, AnirKb, and AOA amoA gene copy abundances in California Current station 60.90

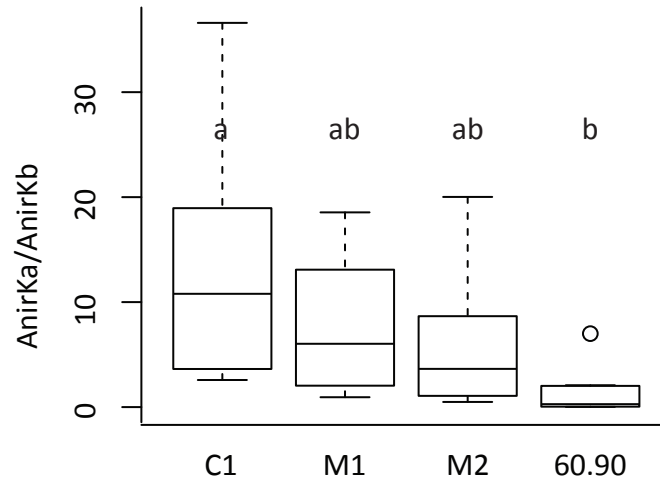

**Supplementary Figure S7.**

Boxplot of the gene copy ratio of AnrKa to AnirKb throughout the water column from the three stations in Monterey Bay and station 60.90 in California Current. Letters above plots indicates significantly different average values between stations (one-way ANOVA,  $p < 0.01$ ).
