# Supplementary material
Source: PubMed Central journal article supplement (PMC3446794)
Supplement: ismej201240x2.pdf [file ismej201240x2.pdf]

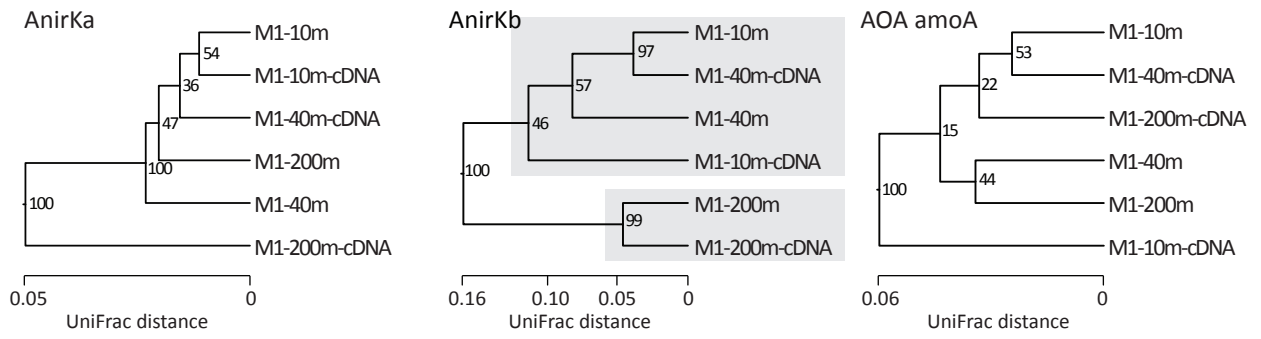

**Supplementary Figure S5.**

Comparisons of community compositions in cDNA- and the corresponding DNA-based clone libraries of AnirKa, AnirKb, and AOA amoA. Weighted UniFrac Jackknife Cluster Analysis with 100 permutations. Numbers on branches are Jackknife values.
